# Supplementary material for: Construction of Sensory/Mass Spectrometry Feedback Platform for Seeking Aroma Contributors during the Aroma Enhancement of Congou Black Tea
Source: MDPI journal article supplement (doi:10.3390/plants11060823), 2022-03-20
Supplement: s1 [file s1]

## Supplementary Material

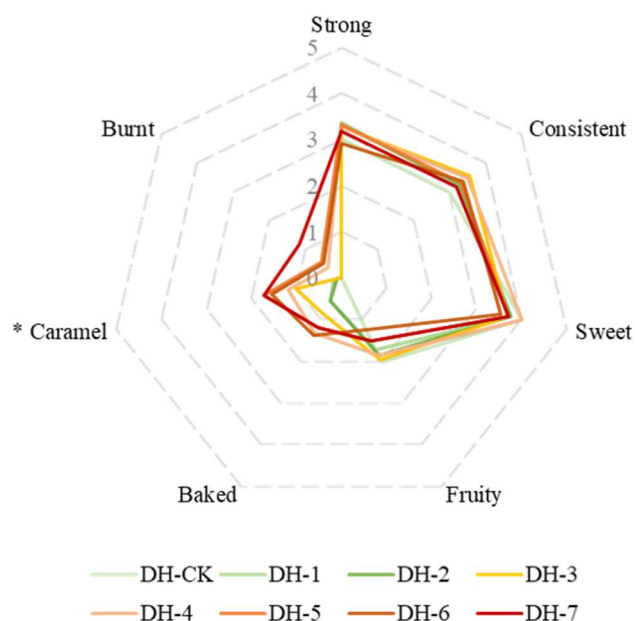

**Figure S1.** Graph of the mean sensory scores of aroma enhanced Yunnan congou black teas baked at 80°C for 0-7 h. \* indicates significance at  $P < 0.05$ .

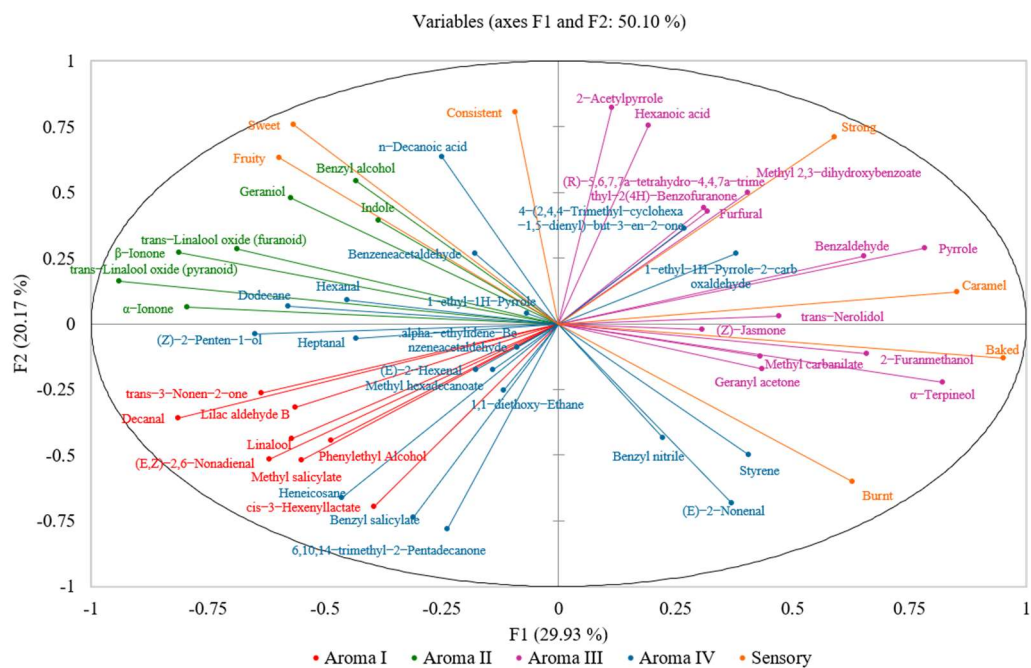

**Figure S2.** Diagram of correlation between aroma properties and aroma compounds in

aroma enhanced Yunnan congou black teas baked at 90°C for 0-7 h.

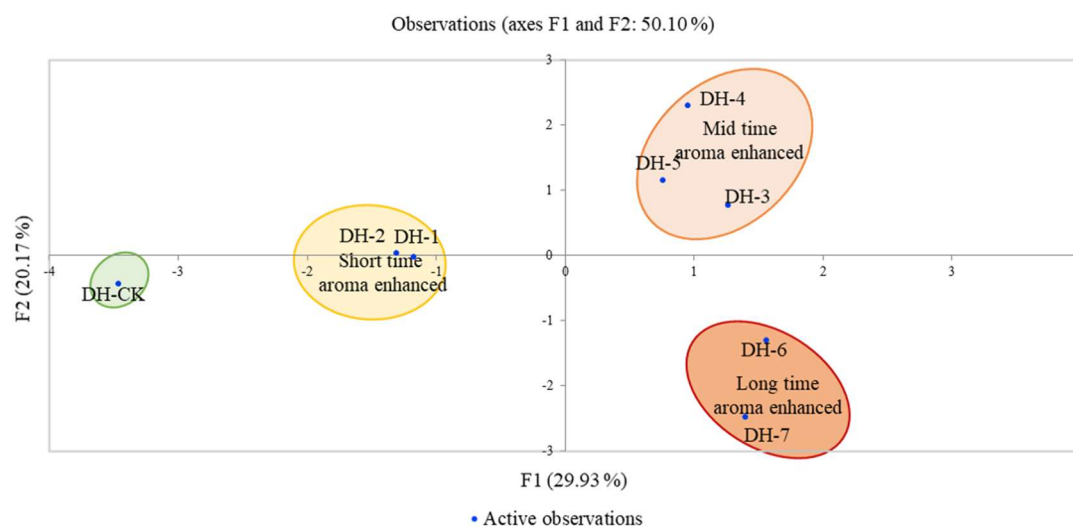

**Figure S3.** Distribution of aroma enhanced Yunnan congou black tea samples baked at 90°C for 0-7 h based on MFA analysis.
