# Supplementary material for: Construction of Sensory/Mass Spectrometry Feedback Platform for Seeking Aroma Contributors during the Aroma Enhancement of Congou Black Tea
Source: MDPI journal article supplement (doi:10.3390/plants11060823), 2022-03-20
Supplement: s1 [file s1]

## Supplementary material

Table S1 Definitions, standards and reference materials used for QDA.

| Attribute  | Definition                                                                     | Reference material                   | Concentration                 |
|------------|--------------------------------------------------------------------------------|--------------------------------------|-------------------------------|
| Strong     | Comprehensive intensity and richness of aroma                                  | DH-CK                                | -                             |
| Consistent | The length of the fragrance retention time                                     | DH-CK                                | -                             |
| Sweet      | The aroma is reminiscent of sugar, such as honey, brown sugar, chocolate, etc. | Vanillin                             | 52.70 $\mu\text{mol mL}^{-1}$ |
| Baked      | Similar to the aroma of roasted sweet potatoes and toasted bread               | 2,5-Dimethylpyrazine                 | 36.25 $\mu\text{mol mL}^{-1}$ |
| Caramel    | Sweet syrup, marshmallow, aroma reminiscent of fried sugar                     | 4-hydroxy-2,5-dimethyl-3(2H)furanone | 53.54 $\mu\text{mol mL}^{-1}$ |
| Fruity     | The aroma of ripe fruits, such as orange, orange, lychee, etc.                 | Ethyl acetate                        | 1.02 $\mu\text{mol mL}^{-1}$  |
| Burnt      | Unpleasant, disgusting smell, high fire smell caused by high temperature       | 2-methoxy-Phenol                     | 8.68 $\mu\text{mol mL}^{-1}$  |

Note: The reference samples were placed in 5 mL glass bottles with lids, and the evaluator used the fan sniffing method for aroma training.

Table S2 Sensory evaluation results of Yunnan congou black tea under different aroma enhancement conditions.

| Sample number     | Aroma (40%)                                                                               |       | Taste (50%)                                                        |       | Liquor color (10%) |       | Total score |
|-------------------|-------------------------------------------------------------------------------------------|-------|--------------------------------------------------------------------|-------|--------------------|-------|-------------|
|                   | Comments                                                                                  | Score | Comments                                                           | Score | Comments           | Score |             |
| DH-CK             | Slightly obvious sweet aroma, little fruity, slightly strong, with mint flavor            | 84.0  | Sweet, slightly strong, mellow, thick, slight umami, brisk         | 85.7  | Orange red, bright | 88.3  | 85.3        |
| DH-1 <sup>a</sup> | Slightly obvious sweet aroma, little fruity, slightly strong, with mint flavor            | 84.0  | Sweet, strong, mellow, thick, slight umami, brisk                  | 87.0  | Orange red, bright | 88.3  | 85.9        |
| DH-2 <sup>a</sup> | Slightly obvious sweet aroma, little fruity, slightly strong, little mint flavor          | 86.0  | Sweet, strong, mellow, thick, slight umami, brisk                  | 87.0  | Orange red, bright | 88.3  | 86.7        |
| DH-3 <sup>a</sup> | Slightly obvious sweet aroma, little fruity, slightly strong, little mint flavor          | 86.0  | Sweet, strong, mellow, thick, slight umami, brisk                  | 87.0  | Orange red, bright | 88.3  | 86.7        |
| DH-4 <sup>a</sup> | Slightly obvious sweet aroma, little fruity, relatively strong                            | 82.7  | Sweet, strong, mellow, thick, slight umami, brisk                  | 85.7  | Orange red, bright | 88.3  | 84.7        |
| DH-5 <sup>a</sup> | Obvious sweet aroma, little fruity, relatively strong                                     | 84.0  | Sweet, strong, mellow, thick, slight umami, brisk, a little sour   | 84.3  | Orange red, bright | 88.3  | 84.6        |
| DH-6 <sup>a</sup> | Obvious sweet aroma, little fruity, with slightly firing smell and sweet potato fragrance | 86.3  | Sweet, strong, mellow, thick, relative umami, brisk, a little sour | 84.3  | Orange red, bright | 88.3  | 85.5        |
| DH-7 <sup>a</sup> | Obvious sweet aroma, little fruity, with firing smell and sweet potato fragrance          | 86.3  | Sweet, strong, mellow, thick, relative umami, brisk, a little sour | 84.3  | Orange red, bright | 88.3  | 85.5        |
| DH-1 <sup>b</sup> | Obvious sweet aroma, little fruity, slightly strong                                       | 86.7  | Sweet, strong, mellow, thick, slight umami, brisk                  | 87.0  | Heavy red, bright  | 90.0  | 87.2        |
| DH-2 <sup>b</sup> | Obvious sweet aroma, little fruity, slightly strong                                       | 87.0  | Sweet, strong, mellow, thick, slight umami, brisk                  | 87.0  | Heavy red, bright  | 90.0  | 87.3        |

|                   |                                                                                                 |      |                                                                                                             |      |                            |      |      |
|-------------------|-------------------------------------------------------------------------------------------------|------|-------------------------------------------------------------------------------------------------------------|------|----------------------------|------|------|
| DH-3 <sup>b</sup> | Obvious sweet aroma, little fruity, slightly strong, with caramel-like aroma                    | 89.3 | Sweet, strong, mellow, thick, slight umami, brisk                                                           | 87.0 | Heavy red, bright          | 90.0 | 88.2 |
| DH-4 <sup>b</sup> | Obvious sweet aroma, little fruity, strong, with caramel-like aroma                             | 90.3 | Sweet, strong, mellow, thick, slight umami, brisk                                                           | 87.0 | Heavy red, bright          | 90.0 | 88.6 |
| DH-5 <sup>b</sup> | Obvious sweet aroma, little fruity, strong, slightly obvious caramel-like aroma                 | 92.0 | Sweet, strong, mellow, thick, slight umami, brisk, a little sour                                            | 85.7 | Heavy red, bright          | 90.0 | 88.6 |
| DH-6 <sup>b</sup> | Obvious sweet aroma, with fruity, strong, slightly obvious caramel-like aroma                   | 91.0 | Sweet, strong, mellow, thick, relative umami, brisk, a little sour                                          | 84.3 | Heavy red, bright          | 90.0 | 87.6 |
| DH-7 <sup>b</sup> | Obvious sweet aroma, with fruity, strong, slightly obvious caramel-like aroma, with burnt aroma | 87.0 | Sweet, strong, mellow, thick, relative umami, brisk, slight sour                                            | 84.3 | Heavy red, bright          | 90.0 | 86.0 |
| DH-1 <sup>c</sup> | Slightly obvious sweet aroma, little fruity, slightly strong                                    | 84.0 | Sweet, slight strong, mellow, thick, slightly umami, brisk                                                  | 85.7 | Heavy red, bright          | 90.0 | 85.4 |
| DH-2 <sup>c</sup> | Slightly obvious sweet aroma, little fruity, slightly strong, with firing smell                 | 86.0 | Sweet, little strong, mellow, thick, slight umami, brisk, a little rough                                    | 85.7 | Heavy red, bright          | 90.0 | 86.2 |
| DH-3 <sup>c</sup> | Slightly obvious sweet aroma, slightly obvious fruity, strong, with caramel-like aroma          | 87.3 | Sweet, little strong, mellow, thick, slight umami, brisk, a little rough                                    | 85.7 | Heavy red, bright          | 90.0 | 86.8 |
| DH-4 <sup>c</sup> | Slightly obvious sweet aroma, little fruity, strong, with caramel-like aroma                    | 87.0 | Sweet, little strong, mellow, thick, slight umami, brisk, a little rough                                    | 85.7 | Heavy red, slightly bright | 89.0 | 86.5 |
| DH-5 <sup>c</sup> | With sweet and fruity aroma, strong, high firing                                                | 86.0 | Sweet, relatively strong, relatively mellow, relatively thick, relative umami, brisk, bitter and astringent | 83.3 | Heavy red, slightly bright | 89.0 | 85.0 |
| DH-6 <sup>c</sup> | With sweet aroma, relatively strong, high firing                                                | 82.3 | Sweet, relatively strong, relatively mellow, relatively thick, bitter and astringent                        | 82.0 | Heavy red, slightly bright | 89.0 | 82.8 |
| DH-7 <sup>c</sup> | With sweet aroma, relatively strong, burnt                                                      | 80.7 | Sweet, relatively mellow, relatively thick, bitter and astringent                                           | 81.0 | Heavy red, slightly bright | 89.0 | 81.7 |

<sup>a</sup> aroma enhanced Yunnan congou black tea baked at 80°C. <sup>b</sup> aroma enhanced Yunnan congou black tea baked at 90°C. <sup>c</sup> aroma enhanced Yunnan congou black tea baked at 100°C.

Table S3 QDA scoring results of Yunnan congou black tea under different aroma enhancement conditions (mean  $\pm$  sd, n = 11)<sup>#</sup>.

| Sample number     | Aroma properties     |                      |                      |                      |                       |                       |                       |
|-------------------|----------------------|----------------------|----------------------|----------------------|-----------------------|-----------------------|-----------------------|
|                   | Strong               | Consistent           | Sweet                | Fruity               | Baked                 | Caramel               | Burnt                 |
| DH-CK             | 3.00 $\pm$ 0.50<br>a | 3.00 $\pm$ 0.50<br>a | 4.00 $\pm$ 0.00<br>a | 2.00 $\pm$ 0.00<br>a | 0.00 $\pm$ 0.00<br>a  | 0.00 $\pm$ 0.00<br>a  | 0.00 $\pm$ 0.00<br>a  |
| DH-1 <sup>a</sup> | 3.36 $\pm$ 0.90<br>a | 3.23 $\pm$ 0.61<br>a | 3.77 $\pm$ 0.90<br>a | 1.73 $\pm$ 0.88<br>a | 0.55 $\pm$ 0.93<br>a  | 0.18 $\pm$ 0.40<br>a  | 0.00 $\pm$ 0.00<br>a  |
| DH-2 <sup>a</sup> | 3.32 $\pm$ 0.87<br>a | 3.27 $\pm$ 0.75<br>a | 3.77 $\pm$ 0.93<br>a | 1.86 $\pm$ 1.03<br>a | 0.55 $\pm$ 0.82<br>a  | 0.09 $\pm$ 0.30<br>a  | 0.00 $\pm$ 0.00<br>a  |
| DH-3 <sup>a</sup> | 3.27 $\pm$ 0.75<br>a | 3.55 $\pm$ 0.69<br>a | 3.68 $\pm$ 1.01<br>a | 1.95 $\pm$ 1.40<br>a | 0.86 $\pm$ 1.05<br>a  | 1.00 $\pm$ 1.41<br>a  | 0.00 $\pm$ 0.00<br>a  |
| DH-4 <sup>a</sup> | 3.27 $\pm$ 0.68<br>a | 3.50 $\pm$ 0.81<br>a | 4.00 $\pm$ 0.95<br>a | 1.86 $\pm$ 1.21<br>a | 1.32 $\pm$ 1.15<br>a  | 1.18 $\pm$ 1.25<br>a  | 0.36 $\pm$ 1.21<br>a  |
| DH-5 <sup>a</sup> | 3.32 $\pm$ 0.46<br>a | 3.32 $\pm$ 0.87<br>a | 3.73 $\pm$ 0.79<br>a | 1.50 $\pm$ 1.20<br>a | 1.18 $\pm$ 1.25<br>a  | 1.73 $\pm$ 1.62<br>a  | 0.55 $\pm$ 1.49<br>a  |
| DH-6 <sup>a</sup> | 2.91 $\pm$ 0.80<br>a | 3.36 $\pm$ 1.05<br>a | 3.55 $\pm$ 1.35<br>a | 1.23 $\pm$ 1.33<br>a | 1.36 $\pm$ 0.92<br>a  | 1.55 $\pm$ 1.29<br>a  | 0.50 $\pm$ 0.92<br>a  |
| DH-7 <sup>a</sup> | 3.18 $\pm$ 0.78<br>a | 3.18 $\pm$ 0.96<br>a | 3.73 $\pm$ 1.47<br>a | 1.50 $\pm$ 1.43<br>a | 1.18 $\pm$ 1.08<br>a  | 1.73 $\pm$ 1.42<br>b  | 1.18 $\pm$ 1.40<br>a  |
| DH-CK             | 3.00 $\pm$ 0.50<br>a | 3.00 $\pm$ 0.50<br>a | 4.00 $\pm$ 0.00<br>a | 2.00 $\pm$ 0.00<br>a | 0.00 $\pm$ 0.00<br>a  | 0.00 $\pm$ 0.00<br>a  | 0.00 $\pm$ 0.00<br>a  |
| DH-1 <sup>b</sup> | 3.23 $\pm$ 0.72<br>a | 3.05 $\pm$ 0.61<br>a | 3.91 $\pm$ 1.11<br>a | 2.09 $\pm$ 0.94<br>a | 0.45 $\pm$ 0.52<br>ac | 0.41 $\pm$ 0.66<br>ac | 0.00 $\pm$ 0.00<br>a  |
| DH-2 <sup>b</sup> | 3.23 $\pm$ 0.56<br>a | 3.36 $\pm$ 0.39<br>a | 4.09 $\pm$ 0.89<br>a | 2.33 $\pm$ 0.82<br>a | 0.82 $\pm$ 0.87<br>ab | 0.55 $\pm$ 0.69<br>ac | 0.00 $\pm$ 0.00<br>a  |
| DH-3 <sup>b</sup> | 3.39 $\pm$ 1.35<br>a | 3.14 $\pm$ 1.32<br>a | 3.82 $\pm$ 1.54<br>a | 1.95 $\pm$ 0.79<br>a | 1.45 $\pm$ 0.82<br>bc | 1.00 $\pm$ 0.72<br>cd | 0.00 $\pm$ 0.00<br>a  |
| DH-4 <sup>b</sup> | 3.86 $\pm$ 0.81<br>a | 3.41 $\pm$ 0.86<br>a | 4.00 $\pm$ 0.92<br>a | 1.91 $\pm$ 0.94<br>a | 1.64 $\pm$ 1.00<br>bc | 1.95 $\pm$ 0.79<br>bd | 0.45 $\pm$ 0.93<br>a  |
| DH-5 <sup>b</sup> | 3.73 $\pm$ 1.15<br>a | 3.18 $\pm$ 1.35<br>a | 4.05 $\pm$ 1.01<br>a | 1.77 $\pm$ 1.03<br>a | 1.68 $\pm$ 1.33<br>bc | 2.27 $\pm$ 1.03<br>b  | 0.55 $\pm$ 1.04<br>a  |
| DH-6 <sup>b</sup> | 3.27 $\pm$ 1.27<br>a | 2.82 $\pm$ 1.40<br>a | 3.50 $\pm$ 1.28<br>a | 1.45 $\pm$ 1.13<br>a | 1.86 $\pm$ 1.52<br>bc | 1.86 $\pm$ 1.45<br>bc | 1.09 $\pm$ 1.38<br>a  |
| DH-7 <sup>b</sup> | 3.27 $\pm$ 1.54<br>a | 2.91 $\pm$ 1.30<br>a | 3.45 $\pm$ 1.29<br>a | 1.00 $\pm$ 1.10<br>a | 2.18 $\pm$ 1.17<br>b  | 1.77 $\pm$ 1.17<br>bc | 1.64 $\pm$ 1.36<br>a  |
| DH-CK             | 3.00 $\pm$ 0.50<br>a | 3.00 $\pm$ 0.50<br>a | 4.00 $\pm$ 0.00<br>a | 2.00 $\pm$ 0.00<br>a | 0.00 $\pm$ 0.00<br>a  | 0.00 $\pm$ 0.00<br>a  | 0.00 $\pm$ 0.00<br>a  |
| DH-1 <sup>c</sup> | 3.45 $\pm$ 0.79<br>a | 3.09 $\pm$ 0.49<br>a | 4.09 $\pm$ 0.63<br>a | 1.77 $\pm$ 1.08<br>a | 0.73 $\pm$ 1.09<br>a  | 0.18 $\pm$ 1.10<br>a  | 0.09 $\pm$ 1.11<br>ac |
| DH-2 <sup>c</sup> | 3.77 $\pm$ 0.98<br>a | 3.14 $\pm$ 0.50<br>a | 4.18 $\pm$ 0.68<br>a | 1.86 $\pm$ 1.19<br>a | 1.23 $\pm$ 1.25<br>a  | 1.18 $\pm$ 1.17<br>ab | 0.27 $\pm$ 0.65<br>ac |

|                   |                |                |                 |                |                |                 |                  |
|-------------------|----------------|----------------|-----------------|----------------|----------------|-----------------|------------------|
| DH-3 <sup>c</sup> | 3.82±0.64<br>a | 3.18±0.81<br>a | 3.91±0.92<br>a  | 1.59±1.32<br>a | 1.68±1.29<br>a | 1.95±1.27<br>b  | 0.36±0.92<br>ac  |
| DH-4 <sup>c</sup> | 3.50±1.10<br>a | 3.18±0.87<br>a | 3.73±1.15<br>a  | 1.36±1.23<br>a | 2.27±1.27<br>a | 2.18±1.06<br>b  | 0.41±1.07<br>ad  |
| DH-5 <sup>c</sup> | 3.00±1.18<br>a | 3.18±1.10<br>a | 3.09±1.28<br>ab | 1.09±1.22<br>a | 1.73±1.27<br>a | 1.68±1.31<br>ab | 1.80±1.44<br>bcd |
| DH-6 <sup>c</sup> | 2.86±1.10<br>a | 3.05±1.06<br>a | 2.95±1.42<br>ab | 0.55±1.04<br>a | 1.82±1.55<br>a | 1.41±1.14<br>ab | 2.36±1.55<br>bd  |
| DH-7 <sup>c</sup> | 2.68±1.19<br>a | 3.36±1.29<br>a | 1.86±1.34<br>b  | 0.64±1.29<br>a | 1.68±1.59<br>a | 1.05±1.21<br>ab | 3.27±1.01<br>b   |

<sup>#</sup> Values in the same row labeled with different letters (a-c) differ significantly ( $p < 0.05$ ).

<sup>a</sup> aroma enhanced Yunnan congou black tea baked at 80°C. <sup>b</sup> aroma enhanced Yunnan congou black tea baked at 90°C. <sup>c</sup> aroma enhanced Yunnan congou black tea baked at 100°C.

Table S4 List of aroma compounds in aroma enhanced Yunnan congou black teas baked at 90°C (0-7 h) identified by GC× MS analysis.

| Aroma category | N o. | Aroma compounds                | Id <sup>a</sup> | Odor description <sup>b</sup>                                | Relative peak area (%) |             |             |             |             |             |             |             |
|----------------|------|--------------------------------|-----------------|--------------------------------------------------------------|------------------------|-------------|-------------|-------------|-------------|-------------|-------------|-------------|
|                |      |                                |                 |                                                              | DH-CK                  | DH-1        | DH-2        | DH-3        | DH-4        | DH-5        | DH-6        | DH-7        |
| Aroma I        | 1    | cis-3-Hexenyllactate           | MS,R<br>I       | Green leafy, sweet melon, waxy, violet leaf, tropical fruity | 4.20±0.03              | 4.10±0.01   | 4.10±0.01   | nd          | nd          | 3.50±0.01   | 4.40±0.01   | 4.10±0.02   |
|                | 2    | Methyl salicylate              | MS,R<br>I,S     | Sweet, wintergreen, aromatic, camphoreous, mint flavor       | 168.50±0.09            | 147.10±0.14 | 142.80±0.49 | 110.10±0.50 | 136.10±0.06 | 142.60±0.03 | 148.10±0.19 | 155.30±0.90 |
|                | 3    | Linalool                       | MS,R<br>I,S     | Citrus, orange, floral, terpy, waxy, rose                    | 507.50±0.57            | 422.20±0.13 | 461.50±2.69 | 269.40±1.81 | 382.90±0.08 | 430.00±0.09 | 443.30±0.53 | 445.40±2.57 |
|                | 4    | Phenylethyl alcohol            | MS,R<br>I,S     | Sweet, floral, fresh bread, floral rose, honey               | 164.20±0.11            | 141.80±0.18 | 148.00±0.85 | 109.10±0.50 | 132.30±0.08 | 150.30±0.08 | 154.50±0.23 | 147.30±0.85 |
|                | 5    | (E,Z)-2,6-Nonadienal           | MS,R<br>I       | Green fatty, dry cucumber, violet leaf                       | 1.60±0.01              | 1.90±0.00   | 2.10±0.01   | nd          | nd          | nd          | nd          | 1.90±0.01   |
|                | 6    | Decanal                        | MS,R<br>I,S     | Sweet, waxy, orange peel, citrus floral                      | 1.70±0.00              | 1.80±0.01   | 1.70±0.00   | nd          | nd          | nd          | nd          | 1.00±0.01   |
|                | 7    | Lilac aldehyde B               | MS,R<br>I       | Fresh flowery                                                | 1.90±0.00              | 2.00±0.01   | 3.50±0.02   | nd          | nd          | 1.70±0.00   | nd          | 2.20±0.01   |
|                | 8    | trans-3-Nonen-2-one            | MS,R<br>I       | /                                                            | 4.10±0.01              | 4.40±0.00   | 3.70±0.00   | nd          | nd          | 4.00±0.00   | nd          | 3.40±0.02   |
| Aroma II       | 9    | β-Ionone                       | MS,R<br>I       | Floral, woody, sweet fruity, berry tropical, beeswax         | 28.10±0.16             | 26.20±0.04  | 26.60±0.15  | nd          | 22.20±0.13  | nd          | nd          | nd          |
|                | 10   | trans-Linalol oxide (pyranoid) | MS,R<br>I       | Woody                                                        | 354.00±0.13            | 286.30±0.56 | 279.40±1.62 | 233.20±1.37 | 248.00±0.15 | 279.00±0.13 | 213.90±1.55 | 227.10±1.19 |

|           |    |                                       |             |                                                                             |                      |                      |                      |                      |                      |                      |                      |                      |
|-----------|----|---------------------------------------|-------------|-----------------------------------------------------------------------------|----------------------|----------------------|----------------------|----------------------|----------------------|----------------------|----------------------|----------------------|
| Aroma III | 11 | $\alpha$ -Ionone                      | MS,R<br>I,S | Violet, woody                                                               | 7.00 $\pm$ 0.<br>04  | 4.90 $\pm$ 0.<br>00  | 4.00 $\pm$ 0.<br>02  | nd                   | 3.70 $\pm$ 0.<br>00  | 4.10 $\pm$ 0.<br>00  | nd                   | 3.50 $\pm$ 0.<br>00  |
|           | 12 | Benzyl<br>alcohol                     | MS,R<br>I,S | Floral, rose, balsamic                                                      | 137.60 $\pm$<br>0.18 | 118.10 $\pm$<br>0.22 | 116.30 $\pm$<br>0.13 | 86.60 $\pm$ 0<br>.42 | 112.10 $\pm$<br>0.12 | 136.10 $\pm$<br>0.07 | 128.70 $\pm$<br>0.19 | nd                   |
|           | 13 | Geraniol                              | MS,R<br>I,S | Floral, sweet, rosey, fruity and<br>citronella-like with a citrus<br>nuance | 200.20 $\pm$<br>0.09 | 174.10 $\pm$<br>0.20 | 169.10 $\pm$<br>0.44 | 128.90 $\pm$<br>0.59 | 145.40 $\pm$<br>0.02 | 152.60 $\pm$<br>0.11 | 167.50 $\pm$<br>0.99 | 1.70 $\pm$ 0.<br>01  |
|           | 14 | trans-Linalool<br>oxide<br>(furanoid) | MS,R<br>I   | Floral                                                                      | 407.00 $\pm$<br>0.80 | 244.80 $\pm$<br>1.42 | 296.80 $\pm$<br>1.72 | 286.10 $\pm$<br>1.16 | 309.40 $\pm$<br>0.46 | 271.80 $\pm$<br>0.09 | 276.70 $\pm$<br>0.47 | 219.20 $\pm$<br>1.21 |
|           | 15 | Indole                                | MS,R<br>I,S | Animal, floral                                                              | 13.90 $\pm$ 0<br>.02 | 10.70 $\pm$ 0<br>.00 | 11.10 $\pm$ 0<br>.02 | 9.10 $\pm$ 0.<br>04  | 13.90 $\pm$ 0<br>.01 | 12.70 $\pm$ 0<br>.01 | 11.50 $\pm$ 0<br>.02 | 10.30 $\pm$ 0<br>.06 |
|           | 16 | Benzaldehyde                          | MS,R<br>I,S | Caramel, almond, fruity,<br>powdery, nutty,                                 | nd                   | 17.70 $\pm$ 0<br>.10 | nd                   | 10.70 $\pm$ 0<br>.07 | 17.90 $\pm$ 0<br>.04 | 14.80 $\pm$ 0<br>.09 | 17.20 $\pm$ 0<br>.03 | 9.50 $\pm$ 0.<br>08  |
|           | 17 | 2-<br>Furanmethano<br>l               | MS,R<br>I,S | Caramel, Coffee, Sweet                                                      | 143.70 $\pm$<br>0.14 | 363.40 $\pm$<br>1.05 | 210.70 $\pm$<br>1.75 | 308.40 $\pm$<br>1.86 | 256.40 $\pm$<br>0.13 | 290.10 $\pm$<br>1.68 | 380.00 $\pm$<br>0.40 | 277.90 $\pm$<br>1.40 |
|           | 18 | .alpha.-<br>Terpineol                 | MS,R<br>I,S | Burnt, woody                                                                | nd                   | 30.30 $\pm$ 0<br>.18 | 13.90 $\pm$ 0<br>.08 | 22.30 $\pm$ 0<br>.09 | 26.30 $\pm$ 0<br>.00 | 26.70 $\pm$ 0<br>.01 | 42.60 $\pm$ 0<br>.05 | 33.10 $\pm$ 0<br>.20 |
|           | 19 | Methyl<br>carbanilate                 | MS,R<br>I   | /                                                                           | nd                   | 2.60 $\pm$ 0.<br>00  | nd                   | nd                   | 3.70 $\pm$ 0.<br>02  | nd                   | 2.90 $\pm$ 0.<br>02  | 2.70 $\pm$ 0.<br>02  |
|           | 20 | (Z)-Jasmone                           | MS,R<br>I   | Woody, herbal, floral, spicy,<br>jasmin, celery                             | nd                   | 14.30 $\pm$ 0<br>.08 | 12.50 $\pm$ 0<br>.07 | nd                   | 12.40 $\pm$ 0<br>.01 | 11.40 $\pm$ 0<br>.01 | 13.20 $\pm$ 0<br>.02 | 10.40 $\pm$ 0<br>.06 |
|           | 21 | Geranyl<br>acetone                    | MS,R<br>I   | Fresh, rose, green<br>leafy, floral magnolia, fruity                        | nd                   | 5.10 $\pm$ 0.<br>03  | 5.00 $\pm$ 0.<br>00  | nd                   | 5.80 $\pm$ 0.<br>01  | 4.40 $\pm$ 0.<br>00  | 5.60 $\pm$ 0.<br>01  | 6.30 $\pm$ 0.<br>04  |

|          |    |                                                              |             |                                                         |                 |                 |                |                 |                 |                 |                 |                 |
|----------|----|--------------------------------------------------------------|-------------|---------------------------------------------------------|-----------------|-----------------|----------------|-----------------|-----------------|-----------------|-----------------|-----------------|
| Aroma IV | 22 | Pyrrole                                                      | MS,R<br>I,S | Sweet, warm, nutty, ethereal                            | nd              | nd              | nd             | 0.50±0.<br>00   | 0.70±0.<br>00   | 1.00±0.<br>00   | 0.60±0.<br>00   | 0.50±0.<br>00   |
|          | 23 | (R)-5,6,7,7a-tetrahydro-4,4,7a-trimethyl-2(4H)-Benzofuranone | MS,R<br>I   | Ripe apricot fruity, berry, woody                       | nd              | nd              | 15.50±0<br>.09 | nd              | 17.10±0<br>.10  | 20.30±0<br>.03  | 15.90±0<br>.09  | nd              |
|          | 24 | trans-Nerolidol                                              | MS,R<br>I   | Floral, green, citrus, woody, waxy                      | nd              | nd              | 32.50±0<br>.06 | nd              | 33.30±0<br>.02  | 27.90±0<br>.02  | 27.30±0<br>.16  | 28.10±0<br>.15  |
|          | 25 | Furfural                                                     | MS,R<br>I,S | Caramel, sweet, woody, almond, fragrant baked bread     | 9.90±0.<br>00   | 16.20±0<br>.05  | 8.90±0.<br>02  | 10.60±0<br>.04  | 22.30±0<br>.10  | 14.70±0<br>.07  | 9.90±0.<br>02   | 15.60±0<br>.12  |
|          | 26 | Hexanoic acid                                                | MS,R<br>I   | Sour, fatty, sweat, cheese                              | 10.30±0<br>.06  | 5.90±0.<br>03   | 0.90±0.<br>01  | 16.60±0<br>.10  | 81.80±0<br>.48  | 14.40±0<br>.08  | nd              | nd              |
|          | 27 | 2-Acetylpyrrole                                              | MS,R<br>I,S | Caramel-like, musty nut skin, cherry maraschino, bready | nd              | 84.10±0<br>.23  | 73.80±0<br>.43 | 58.10±0<br>.34  | 102.00±<br>0.02 | 125.80±<br>0.06 | nd              | nd              |
|          | 28 | Methyl 2,3-dihydroxybenzoate                                 | MS,R<br>I   | /                                                       | nd              | 3.80±0.<br>01   | 3.50±0.<br>01  | 3.90±0.<br>01   | 5.70±0.<br>00   | 4.40±0.<br>01   | nd              | 4.20±0.<br>02   |
|          | 29 | 1-ethyl-1H-Pyrrole                                           | MS,R<br>I,S | Burnt                                                   | 20.90±0<br>.02  | 21.40±0<br>.02  | nd             | 13.60±0<br>.09  | 17.00±0<br>.05  | 15.40±0<br>.03  | 18.80±0<br>.03  | 12.20±0<br>.11  |
|          | 30 | 1-ethyl-1H-Pyrrole-2-carboxaldehyde                          | MS,R<br>I,S | Burnt roasted smoky                                     | 103.40±<br>0.26 | 120.50±<br>0.14 | nd             | 119.20±<br>0.71 | 154.50±<br>0.89 | 121.00±<br>0.70 | 111.40±<br>0.65 | 107.30±<br>0.67 |



|    |                                        |             |                                                                                      |                 |                 |                |                 |                 |                 |                |                 |
|----|----------------------------------------|-------------|--------------------------------------------------------------------------------------|-----------------|-----------------|----------------|-----------------|-----------------|-----------------|----------------|-----------------|
| 31 | Benzeneacetaldehyde                    | MS,R<br>I,S | Honey, floral rose, sweet, powdery, fermented, chocolate with a slight earthy nuance | 297.00±<br>0.24 | 249.60±<br>0.40 | nd             | 186.10±<br>0.56 | 235.10±<br>0.12 | 330.30±<br>0.69 | nd             | 233.30±<br>1.60 |
| 32 | n-Decanoic acid                        | MS,R<br>I   | Rancid, sour, fatty, citrus                                                          | 5.10±0.<br>03   | 7.90±0.<br>05   | nd             | nd              | 9.00±0.<br>05   | 7.30±0.<br>04   | nd             | nd              |
| 33 | Hexanal                                | MS,R<br>I,S | Fresh, green grass, leafy, fruity, sweaty,fatty                                      | 97.70±0<br>.11  | 85.90±0<br>.08  | 27.80±0<br>.05 | 21.40±0<br>.10  | 59.90±0<br>.05  | 73.90±0<br>.06  | 81.10±0<br>.11 | 24.80±0<br>.15  |
| 34 | (E)-2-Hexenal                          | MS,R<br>I   | Green leafy                                                                          | 27.00±0<br>.02  | 23.10±0<br>.13  | nd             | nd              | 19.80±0<br>.03  | 23.70±0<br>.05  | 17.90±0<br>.10 | 22.70±0<br>.13  |
| 35 | .alpha.-ethylidene-Benzeneacetaldehyde | MS,R<br>I   | Sweet, honey, cocoa, nutty, radish                                                   | 5.60±0.<br>00   | 5.30±0.<br>01   | nd             | nd              | 5.50±0.<br>00   | 4.40±0.<br>00   | 5.50±0.<br>01  | 4.10±0.<br>01   |
| 36 | 1,1-diethoxy-Ethane                    | MS,R<br>I   | Pungent, ethereal, fruity                                                            | 44.30±0<br>.01  | 55.80±0<br>.05  | 27.20±0<br>.02 | 29.10±0<br>.01  | 39.20±0<br>.02  | 25.90±0<br>.03  | 61.70±0<br>.05 | 31.30±0<br>.04  |
| 37 | Heneicosane                            | MS,R<br>I   | Waxy                                                                                 | 44.40±0<br>.26  | 30.40±0<br>.18  | nd             | 6.00±0.<br>04   | nd              | nd              | 26.20±0<br>.22 | 28.10±0<br>.13  |
| 38 | Heptanal                               | MS,R<br>I   | Fresh, fatty, green herbal                                                           | 3.10±0.<br>02   | 6.20±0.<br>01   | nd             | 2.20±0.<br>01   | 0.40±0.<br>00   | 1.70±0.<br>01   | nd             | 1.70±0.<br>01   |
| 39 | Methyl palmitate                       | MS,R<br>I   | Oily, waxy, fatty                                                                    | 13.80±0<br>.01  | 13.70±0<br>.01  | nd             | nd              | 18.50±0<br>.11  | nd              | nd             | 21.30±0<br>.08  |
| 40 | (Z)-2-Penten-1-ol                      | MS,R<br>I,S | /                                                                                    | 9.30±0.<br>01   | 7.90±0.<br>02   | 5.70±0.<br>05  | nd              | 7.90±0.<br>05   | nd              | nd             | 6.30±0.<br>05   |
| 41 | Dodecane                               | MS,R<br>I   | Odorless                                                                             | 5.10±0.<br>00   | 3.20±0.<br>02   | nd             | nd              | 3.80±0.<br>02   | nd              | nd             | 2.00±0.<br>01   |

|    |                                                         |             |                                          |                |               |                |                |               |               |                |                |
|----|---------------------------------------------------------|-------------|------------------------------------------|----------------|---------------|----------------|----------------|---------------|---------------|----------------|----------------|
| 42 | Benzyl nitrile                                          | MS,R<br>I   | /                                        | 3.60±0.<br>01  | nd            | nd             | 3.00±0.<br>02  | nd            | 4.10±0.<br>00 | 3.60±0.<br>01  | 3.70±0.<br>02  |
| 43 | (E)-2-Nonenal                                           | MS,R<br>I   | Fatty, green cucumber, citrus            | nd             | nd            | 4.30±0.<br>03  | nd             | nd            | 2.20±0.<br>01 | 4.90±0.<br>03  | 5.40±0.<br>03  |
| 44 | 6,10,14-trimethyl-2-Pentadecanone                       | MS,R<br>I   | /                                        | 11.20±0<br>.00 | nd            | 11.50±0<br>.02 | nd             | nd            | nd            | 11.20±0<br>.06 | 12.60±0<br>.06 |
| 45 | 4-(2,4,4-Trimethyl-cyclohexa-1,5-dienyl)-but-3-en-2-one | MS,R<br>I   | /                                        | nd             | 4.20±0.<br>02 | 4.40±0.<br>03  | 28.00±0<br>.17 | 3.90±0.<br>02 | 3.80±0.<br>02 | nd             | nd             |
| 46 | Styrene                                                 | MS,R<br>I,S | Sweet, balsamic, floral, plastic, almond | nd             | 8.80±0.<br>01 | 4.30±0.<br>01  | 15.90±0<br>.10 | nd            | nd            | 4.90±0.<br>03  | 16.50±0<br>.10 |
| 47 | Benzyl salicylate                                       | MS,R<br>I   | Balsamic, clean herbal, oily, sweet      | 5.10±0.<br>00  | 5.10±0.<br>03 | 5.20±0.<br>03  | 5.00±0.<br>02  | nd            | nd            | 3.40±0.<br>02  | 6.50±0.<br>05  |

<sup>a</sup>, identification method. MS, identification based on the NIST 2017 mass spectral database; RI, retention index; S, the compounds were identified using authentic standard compounds. <sup>b</sup>, the aroma descriptions of the aroma compounds in the table were all from the aroma compounds website: <http://thegoodscentscompany.com>; /, <sup>c</sup>, relative peak area represented relative content which was expressed as mean ± sd; aroma descriptions are not found; 'nd', aroma compounds were not detected.
